# Supplementary material for: Losartan protects human stem cell-derived cardiomyocytes from angiotensin II-induced alcoholic cardiotoxicity
Source: PubMed Central journal article supplement (PMC8960777; doi:10.1038/s41420-022-00945-2), 2022-03-28

## **Supplementary Figure legends**

### **Supplementary Figure 1 Changes of electrophysiological activity of cardiomyocytes induced by alcohol at different concentrations**

**A.**MEA showed changes in FP of cardiomyocytes treated with 100, 200 and 400mM alcohol.**B.**MEA showed changes in contractility of cardiomyocytes treated with 100, 200 and 400mM alcohol.

### **Supplementary Figure 2 Alcohol induced NOX4 upregulation and AngII/AT1R activation in cardiomyocytes.**

**A.**The expression of AT1R protein was determined by western blot after treatment with 100mM alcohol for 24 h. **B.**The expression of NOX4 protein was determined by western blot after treatment with 100mM alcohol for 24 h. **C.** Enzyme-linked immunosorbent assay (ELISA) showed that the level of AngII increased in hiPSC-CMs culture medium after alcohol treatment in a dose dependent manner. **D.**Western blot showed that phosphorylated P38 increased significantly after treatment with alcohol .

### **Supplementary Figure 3 losartan prevented alcohol-induced apoptosis in hiPSC-CMs.**

**A.**The heatmap showed genes that are significantly regulated with or without losartan after 100mM alcohol treatment of hiPSC-CMs. **B.**The enriched terms GO showed that losartan restored the increase in apoptosis signaling pathways and negative regulation of biological processes induced by 100 mM alcohol . **C.** LDH activity assay (below, n=7) showed that losartan restored the cell damage induced by 100 mM alcohol. **D.** The CCK8 assay (above, n=4) showed that losartan restored the decreased cell viability induced by 100 mM alcohol.

### **Supplementary Figure 4 Unclipped image of western blotting of each figure**

**Supplementary Figure 5 Identification of hiPSC cell lines.** **A.**Mycoplasma testing revealed that the cell line was not infected with mycoplasma.**B.**STR detection in hiPSC cell lines.

## Supplementary Tables

### Supplementary Table 1: Primer sequences used for q-PCR

| Gene  | Forward primers (5'-3') | Reward primers (5'-3') |
|-------|-------------------------|------------------------|
| NOX2  | TCACTTCCTCCACCAAACC     | GGGATTGGGCATTCCTTTAT   |
| NOX4  | CTTCCGTTGGTTTGCAGATT    | TGGGTCCACAACAGAAAACA   |
| AT1R  | GAATATTTGGAAACAGCTTGGT  | CAAAGTCAGTAAAAAGCATAAG |
| AngII | GCTAAGGACCCCACTGTTGCTA  | TGTAGATGCCATTCGTGGTGTG |
| GAPDH | CAATGACCCCTTCATTGACC    | GACAAGCTTCCCGTTCTCAG   |

**Supplementary Table 2: Antibodies for immunofluorescence, flow cytometry and western blot in this study**

| Antibody                                       | Application | Dilution | Manufacturer | Catalog   |
|------------------------------------------------|-------------|----------|--------------|-----------|
| Anti-OCT4                                      | IF          | 1:100    | Santa Cruz   | sc-9081   |
| Anti-SSEA4                                     | IF          | 1:100    | Santa Cruz   | sc-21706  |
| Anti-cTnT                                      | IF          | 1:100    | Abcam        | ab8295    |
|                                                | FC          | 1:200    |              |           |
| Anti-AT1R                                      | WB          | 1:500    | Santa Cruz   | sc-515884 |
| Anti-NOX4                                      | WB          | 1:500    | Santa Cruz   | sc-518092 |
| Anti-GAPDH                                     | WB          | 1:500    | Abcam        | ab181602  |
| Goat anti-Mouse<br>IgG Alexa Fluor 594         | IF          | 1:200    | Invitrogen   | A21145    |
| Goat anti-Rabbit IgG<br>Alexa Fluor 488        | IF          | 1:200    | Invitrogen   | A32731    |
| Goat anti-Rabbit IgG<br>(H + L) IRDye<br>800CW | WB          | 1:20000  | LI-COR       | 926-32211 |
| Goat anti-Mouse<br>IgG (H + L) IRDye<br>800CW  | WB          | 1:20000  | LI-COR       | 926-32211 |

IF: Immunofluorescence

FC: Flow cytometry

WB: Western Blot

**A**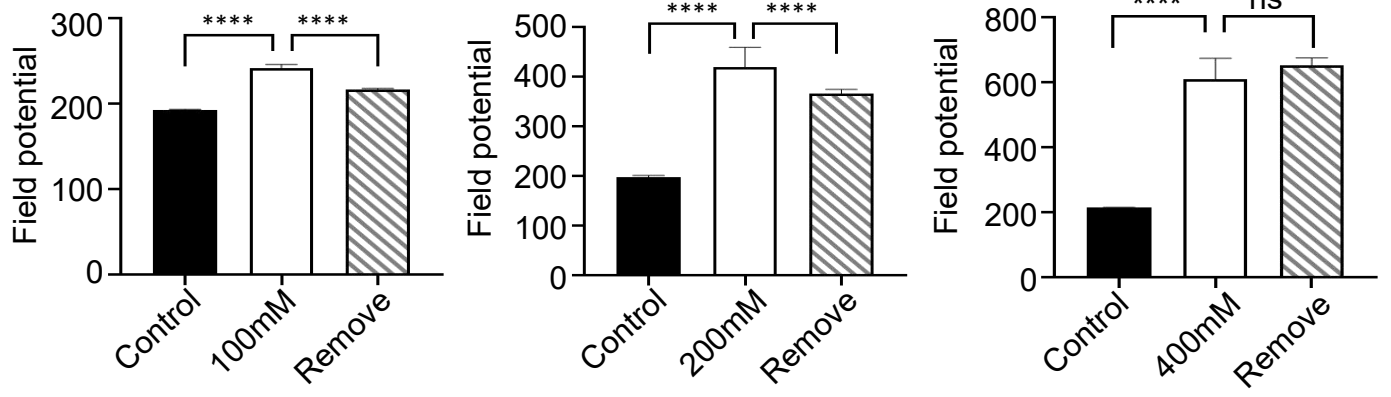**B**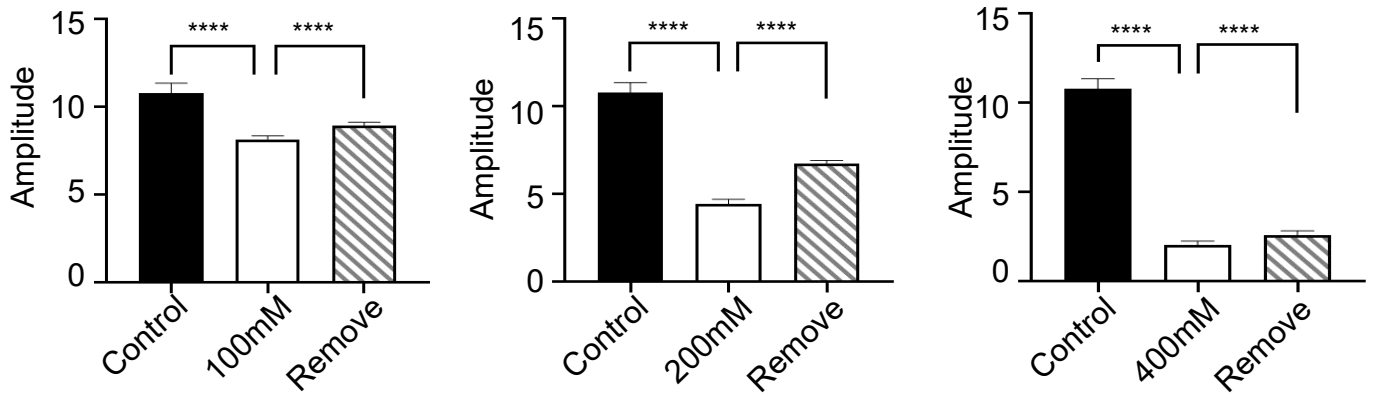

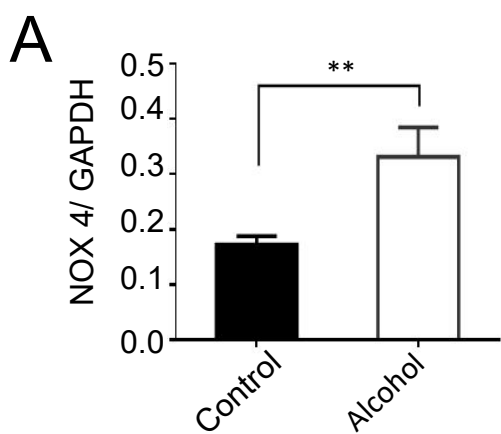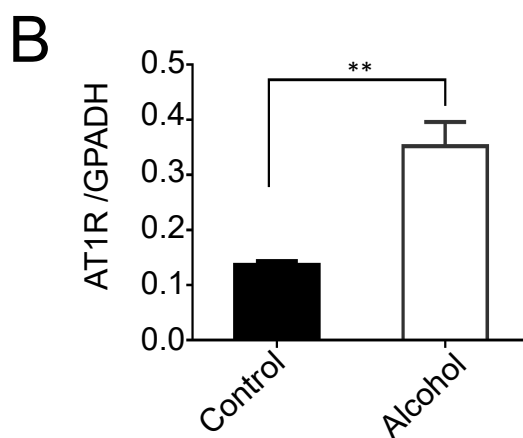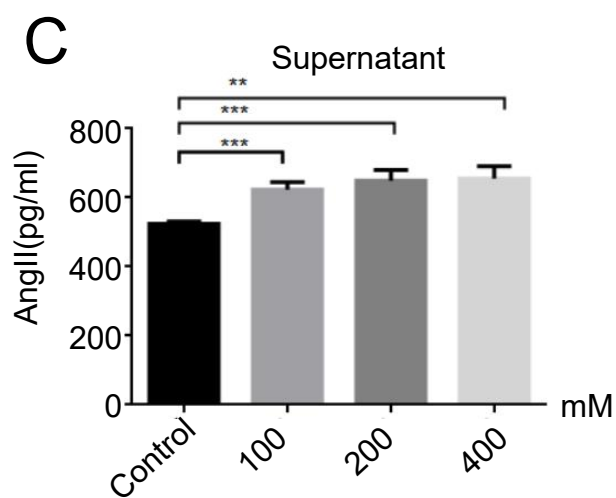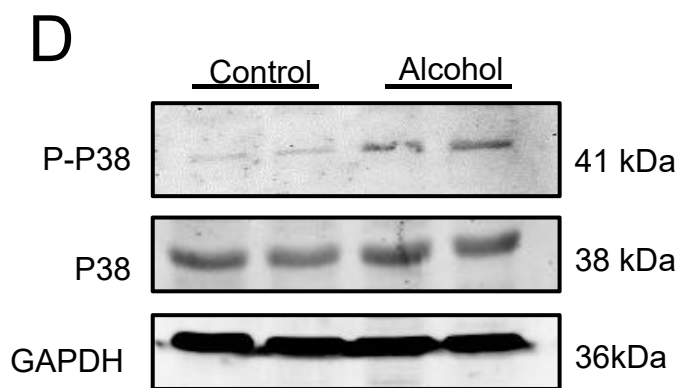

A

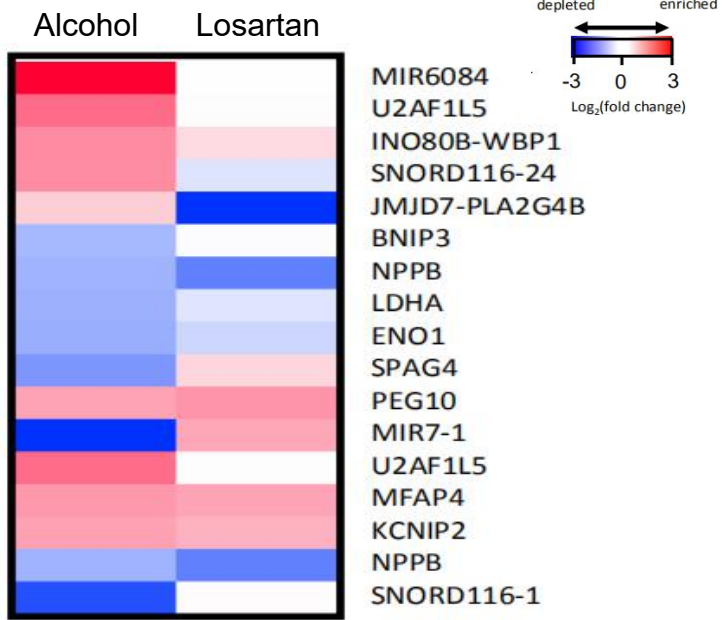

B

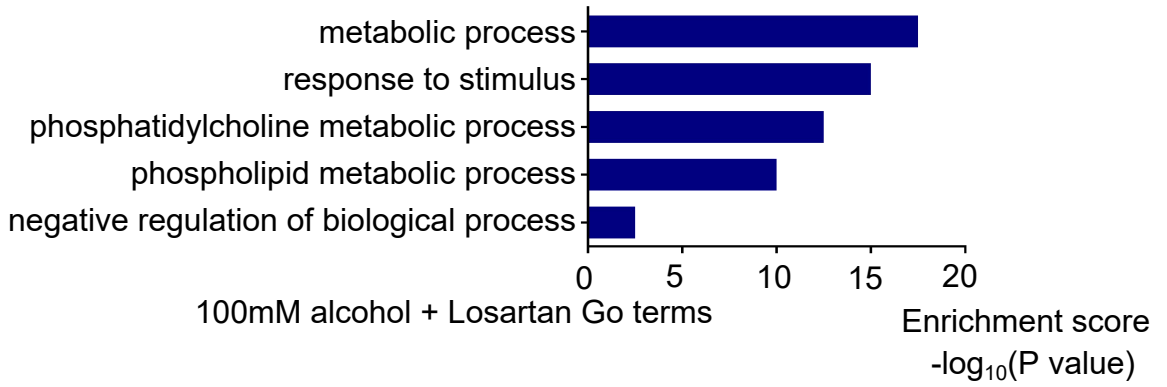

C

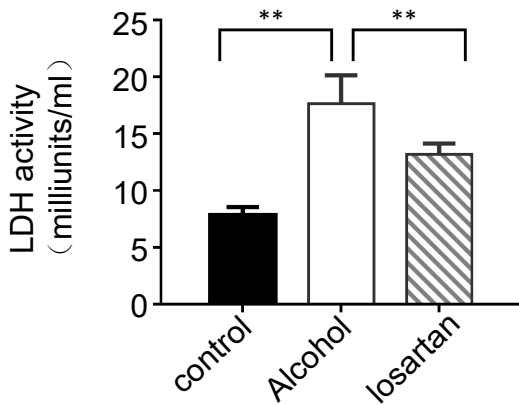

D

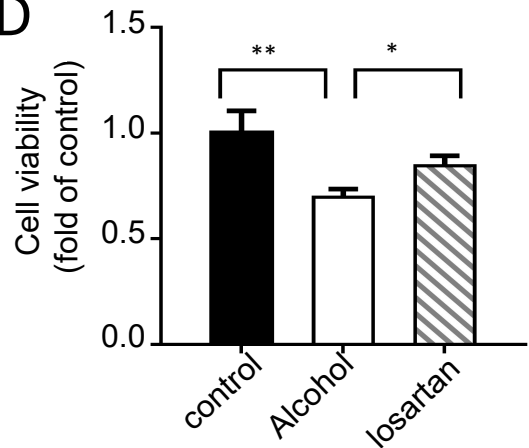

NOX4  
(Fig.4D)

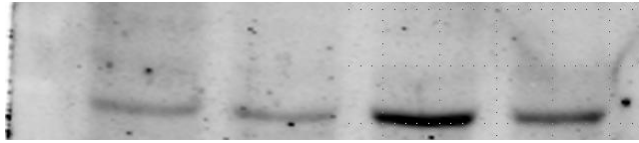

GAPDH  
(Fig.4D)

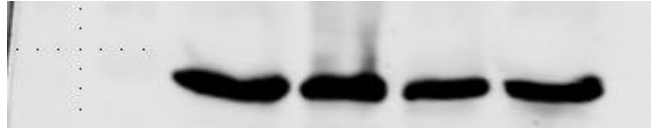

NOX4  
(Fig.5D)

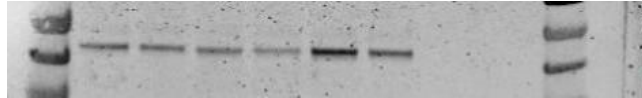

GAPDH  
(Fig.5D)

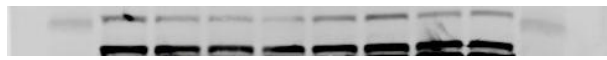

P-P38  
(Figure.S2D)

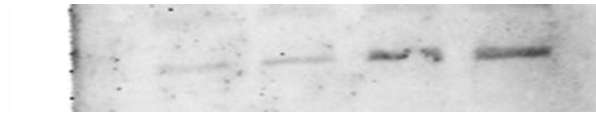

P38  
(Figure.S2D)

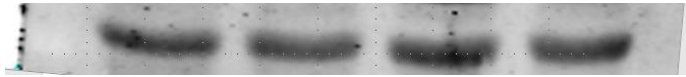

GAPDH  
(Figure.S2D)

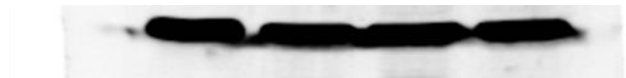

A

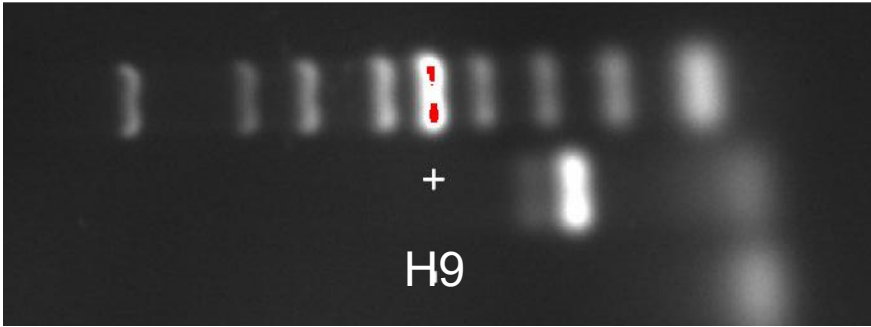

H9 STR

B

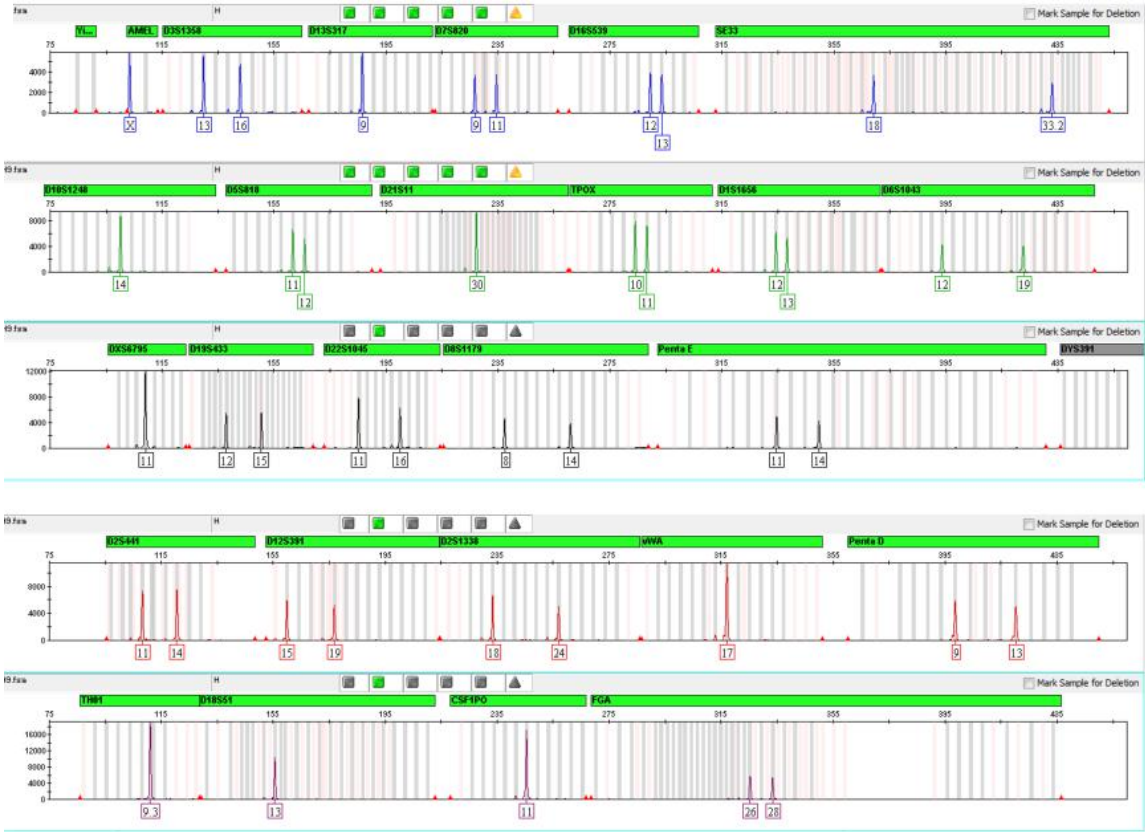

Supplement: 41420_2022_945_MOESM1_ESM.pdf [file 41420_2022_945_MOESM1_ESM.pdf]
